# Supplementary material for: Temporal Changes in the Relationship Between Central Venous Pressure and B-Line Score in Patients Undergoing Transurethral Resection of the Prostate: Evidence from a Generalized Estimating Equations Model
Source: Research Square preprint supplement (doi:10.21203/rs.3.rs-7371999/v1), 2025-09-17
Supplement: Supplementary file 1 [file 927c76f7176ca066b1a46954.xlsx]

## Sheet: 无标题3
ID	name	age	weight	height	surgical_duration	anesthesia_duration	recovery_duration	Intraoperative infusion volume	Intraoperative flushing volume	Bline_T0	Bline_T1	Bline_T2	Bline_T3	Bline_T4	CVP_T0	CVP_T1	CVP_T2	CVP_T3	CVP_T4	Na_T0	Na_T1	Na_T2	Na_T3	Na_T4	K_T0	K_T1	K_T2	K_T3	K_T4	PaO₂/FiO₂ ratio_T0	PaO₂/FiO₂ ratio_T1	PaO₂/FiO₂ ratio_T2	PaO₂/FiO₂ ratio_T3	PaO₂/FiO₂ ratio_T4	Hb_T0	Hb_T1	Hb_T2	Hb_T3	Hb_T4	Ppeak_T0	Ppeak_T1	Ppeak_T2	Ppeak_T3	Ppeak_T4
1	WeiXianZao	76	57	156	77	82	80	290	20200	0	1	1	2	3	1	1	3	4	5	142	143	143	143	143	3.9	3.9	3.7	3.3	2.9	339	330	308	284	278	108.8	105.6	102.4	100.8	93.9	16	16	17	18	20
2	LiJingFeng	53	71	160	80	87	75	470	22700	0	0	1	2	4	3	3	4	6	8	139	141	141	142	142	4	4.1	3.9	3.8	3.6	378	369	342	333	326	113	109.3	104.5	102	97.9	19	20	21	22	22
3	TanHuaQin	62	60	166	82	90	55	330	21400	2	2	2	3	4	2	2	3	4	6	136	136	140	138	141	4.7	4.4	4.3	3.9	3.7	349	323	293	276	256	109.9	106.8	103.3	101.5	95.4	21	22	23	24	25
4	YangBiao	55	57	170	88	93	63	420	20100	1	1	1	2	4	1	1	4	6	7	139	139	141	139	141	4.1	3.8	3.5	3.1	3	336	314	299	282	275	101.9	100.2	93	90.3	87.9	22	22	24	25	28
5	ZhaoQiongM	71	63	173	90	94	113	470	20000	2	2	2	4	5	4	4	5	6	8	132	134	135	136	135	4.5	4.5	4.2	3.9	3.8	310	300	271	248	239	105.2	100.2	92.8	91.1	89.7	15	15	17	18	20
6	NongLiangM	57	60	155	91	94	61	360	23900	0	0	2	2	3	4	4	6	7	9	137	137	139	139	142	4.3	4.3	4.3	3.9	3.6	309	295	275	258	250	120	116.3	107.5	104.6	100.9	22	24	26	27	30
7	TanShaoJin	63	70	170	80	96	101	560	21700	0	0	2	3	3	1	1	3	6	8	135	134	136	136	137	3.7	3.8	3.6	3.4	3	264	253	236	211	202	101.6	98.7	95.3	94.3	86.5	21	23	25	26	29
8	PanGuangFa	77	65	178	92	97	66	600	20000	0	1	2	2	3	2	2	3	4	6	141	141	141	141	142	5	5	4.7	4.4	4.1	312	287	262	237	230	130.1	126.2	122.2	121	117.4	20	20	22	22	24
9	MoYuanXing	73	50	158	74	97	75	250	20900	2	2	3	4	5	4	4	7	9	11	130	130	131	131	132	4.1	4	3.8	3.7	3.5	355	331	312	304	298	112	109.3	104.6	102.3	97.9	20	21	22	23	25
10	LiangZhong	70	70	170	86	99	55	500	20600	2	2	3	4	6	1	1	4	6	7	129	129	130	130	130	4.1	4	3.9	3.7	3.6	310	297	269	250	240	110.6	107.1	102.6	101.1	98.7	15	15	17	18	18
11	YangWenCha	68	70	164	99	105	105	580	22500	2	2	2	4	4	2	3	4	7	8	128	128	129	132	132	3.8	3.5	3.3	3.2	3	285	270	253	244	235	112.3	111.3	102.3	99.6	96	21	22	23	23	23
12	PanYouQuan	75	54	171	97	105	82	350	24900	0	0	1	2	4	1	1	3	6	8	129	132	132	132	133	3.8	3.5	3.2	3	2.7	370	348	319	306	300	104.1	102.9	96.2	94.3	88.5	19	20	22	22	24
13	XuGuoYing	65	59	175	85	106	50	500	21500	0	0	2	2	2	4	4	6	7	9	132	134	134	134	135	4	3.7	3.4	3.2	3	304	277	242	233	227	130.2	127.8	121.7	119.8	112.1	22	24	26	27	30
14	YangDeFa	80	67	160	102	108	88	460	24800	0	0	1	2	3	2	2	5	7	9	142	142	144	144	146	3.9	3.8	3.7	3.6	3.4	328	308	287	262	254	124.6	121.9	114.2	112.4	110.9	15	15	17	17	19
15	LiaoJiaYou	70	62	158	85	108	62	440	24700	2	2	2	3	4	2	2	3	6	8	135	136	137	137	137	3.8	3.5	3.3	3.1	2.7	328	306	284	269	260	139.4	134.7	126.6	124.4	121.5	19	19	21	21	22
16	LiuZeXi	65	57	154	75	108	44	290	21700	2	2	2	3	3	2	2	6	8	9	142	142	143	143	146	4.1	4.1	4.1	4	3.9	291	278	257	242	232	108.4	104.9	100.2	97.9	93	15	16	17	17	19
17	LuoHuanShe	73	70	170	92	108	60	540	20000	0	0	1	2	4	4	4	5	8	9	138	138	140	140	140	4.1	3.9	3.6	3.5	3.3	334	326	294	276	269	133.3	128.4	122.2	120	114.1	17	19	21	21	23
18	CengYiShan	73	70	170	95	109	63	550	27400	0	0	2	2	3	3	3	5	7	9	138	138	141	141	141	4.5	4.3	4	3.8	3.6	358	344	317	292	282	130.6	128.4	123.6	120.8	117.9	21	21	23	24	24
19	ChenJiaQia	67	66	175	101	110	65	560	28500	0	0	3	4	4	1	1	5	6	7	128	127	131	131	132	3.6	3.6	3.6	3.5	3.1	358	335	304	282	274	102.4	98.1	92.1	90.7	86.7	18	20	22	23	26
20	XiaoLiCai	76	60	162	107	110	77	640	27400	0	0	1	1	4	5	5	7	8	10	132	131	133	133	134	4.6	4.4	4.1	3.7	3.5	362	349	328	310	302	137.2	135.6	130.4	128.4	121.9	17	18	19	19	20
21	HuangXueQi	55	74	169	101	112	96	500	23000	1	1	2	3	4	4	4	6	7	9	135	137	137	137	140	4.8	4.8	4.7	4.5	4.1	266	256	224	198	191	131.5	128.6	121.2	119.4	112.7	17	18	19	19	21
22	LuYongHe	63	48	158	89	112	79	280	25400	2	2	2	4	4	5	5	8	10	11	134	133	133	133	133	3.7	3.7	3.7	3.4	3.3	299	274	242	228	220	120.9	116.2	112.2	110.4	106.5	21	21	23	23	23
23	ChenYunXin	72	75	169	108	112	85	540	32300	0	1	2	2	4	1	1	4	7	8	141	142	143	143	144	4	3.8	3.8	3.7	3.3	358	344	316	291	284	136.7	135.3	127.8	125	117.4	21	22	24	25	26
24	ChenTianYu	74	58	168	90	118	54	350	21900	1	1	2	3	7	3	3	4	7	9	139	138	140	140	140	4.4	4.4	4.4	4.1	3.9	358	348	313	294	287	139.2	135.6	131.4	129.6	121.7	15	16	18	18	20
25	PanTingChe	71	57	155	112	118	65	640	23600	2	2	2	3	3	2	2	4	5	6	140	141	142	142	144	4.9	4.8	4.5	4.4	4.2	340	330	298	275	266	107.9	104.4	101.1	98.9	93.6	18	20	22	22	22
26	LiZuoLin	83	58	163	115	119	69	440	31200	0	0	2	2	2	5	5	8	9	10	135	135	137	137	139	4.3	4.1	3.8	3.4	3.3	370	351	316	305	296	103.9	100	93.9	90.9	84.6	21	22	23	24	27
27	NongBingZh	73	47	160	91	120	74	290	22800	0	1	3	3	3	5	5	8	10	12	129	129	132	132	132	4.8	4.9	4.9	4.6	4.3	308	290	271	249	240	102.9	99.8	93.5	91.2	85.6	21	21	22	22	25
28	YangXianJi	81	60	170	87	120	111	350	23100	0	0	2	2	3	1	1	5	8	10	132	131	132	132	133	4.4	4.5	4.3	4	3.9	366	349	318	292	285	109.5	106.1	98.1	96.2	90.7	15	15	17	18	20
29	LaoPeiYing	73	50	159	117	123	74	390	27400	0	0	2	2	3	1	1	4	5	7	137	137	138	138	139	5	4.7	4.6	4.4	4.3	270	251	219	199	193	135.5	134.5	127.7	125.6	123.1	15	17	18	18	19
30	ZhongDiNen	69	46	160	88	123	67	400	21100	2	2	3	3	4	2	2	6	9	10	141	141	143	143	144	3.8	3.5	3.5	3.4	3	381	364	329	312	287	103.4	99.3	94.5	92.6	90.1	21	23	25	25	25
31	ZhangGuiYo	86	52	164	122	128	103	630	32000	2	2	2	4	4	4	4	7	10	11	143	143	145	145	145	3.7	3.7	3.5	3.3	2.9	377	356	334	315	309	109.2	107.3	98.4	96.4	90.2	22	23	25	26	27
32	YuTao	61	80	165	123	128	57	660	32700	0	0	2	2	3	1	1	3	6	7	141	142	144	144	147	5	5	4.9	4.6	4.2	357	338	321	301	294	112.6	110.3	104.1	102	96.5	22	22	24	24	26
33	CengGuiWen	70	63	164	113	129	80	710	24700	2	2	2	2	3	3	3	5	7	8	141	140	142	142	145	4.3	4	3.8	3.7	3.5	271	262	242	227	219	120.2	117.6	109	106.6	100.8	16	17	18	19	20
34	CengLingDe	77	52	162	127	130	85	440	30700	2	2	3	4	4	3	3	6	7	8	136	136	138	138	138	3.7	3.7	3.5	3.2	2.8	373	362	332	315	278	120.1	117.9	114.2	111.7	105.4	21	21	22	22	22
35	HuangZhiYo	61	73	168	109	131	64	530	22200	2	2	2	5	6	1	1	3	6	7	136	137	139	139	139	4.5	4.4	4.3	4	3.9	372	362	334	312	306	105.9	103.1	99.5	98	90.8	18	18	20	21	21
36	LeiYongFan	84	69	168	125	133	99	580	34500	2	2	2	4	4	1	1	3	5	6	133	133	134	134	134	4.9	4.9	4.6	4.2	4	337	314	295	275	259	124.5	120.2	114.6	112.7	111.1	20	20	22	23	23
37	LuXianJun	66	65	168	120	134	95	520	34400	1	1	2	3	3	2	2	5	8	10	141	142	144	144	145	4.7	4.6	4.5	4.1	3.7	290	270	237	214	207	104.7	102.3	98.7	96	90.8	19	20	22	23	23
38	WeiXiangKe	87	47	157	129	135	109	610	26400	1	1	2	2	4	4	4	7	9	11	135	134	134	134	135	3.7	3.8	3.8	3.6	3.3	302	291	258	235	228	109.6	105	97	94.6	90.9	20	20	22	22	24
39	ZhengXiWen	75	75	176	130	135	55	650	30000	1	1	2	4	5	2	2	3	4	5	132	132	134	134	136	4.4	4.1	3.9	3.8	3.5	361	347	319	309	302	117.3	115.8	112.4	110	105.9	15	16	18	18	20
40	YangJianAn	57	64	167	120	136	48	770	33600	1	1	1	1	4	4	4	5	6	7	136	137	137	137	140	4.2	4	4	3.8	3.5	314	294	271	261	252	123.5	122.1	116.4	113.4	109.6	19	19	21	21	21
41	XiangJianT	68	63	163	117	137	57	740	32800	0	0	1	2	3	2	2	6	8	9	142	143	145	145	147	3.8	3.9	3.6	3.3	3.1	377	363	339	319	312	119.1	116.1	112.2	110.2	108	16	18	19	19	19
42	LiuBaiMing	59	60	160	135	138	46	810	27000	2	2	3	3	4	4	4	7	9	10	133	133	133	133	135	4.1	4.2	3.9	3.6	3.3	328	305	273	252	246	139.8	134.8	126.8	124.1	122.6	17	19	20	20	20
43	WuLiangSho	78	71	170	132	140	87	780	29700	1	1	3	4	4	5	5	8	9	11	139	141	142	142	145	5.1	5	4.8	4.4	4.1	339	327	310	298	289	111.7	110.2	101.5	98.5	96.7	17	19	21	21	21
44	WeiZiShui	68	66	168	118	140	74	780	23700	2	2	3	4	5	2	2	5	8	10	139	140	142	142	142	4.5	4.6	4.3	3.9	3.8	362	337	307	284	277	103.7	98.9	91.2	88.9	81	16	18	20	21	23
45	XieYuXun	75	59	162	132	141	58	520	39300	1	1	3	7	8	5	5	8	10	11	138	139	139	139	139	4.2	4	3.7	3.5	3.2	303	296	280	266	259	104.3	102.4	93.8	90.8	86	22	24	25	25	25
46	LuTianRen	69	55	165	121	141	88	550	26400	2	2	3	3	4	3	3	5	7	8	139	139	141	141	141	4.4	4.3	4.1	3.7	3.6	384	371	356	342	336	109.9	106.3	103.2	100.2	93.4	18	19	20	20	20
47	LuChengJin	75	60	155	121	144	74	730	34700	1	1	2	2	4	4	4	6	8	9	141	141	143	143	145	4.5	4.4	4.2	4	3.9	328	317	298	276	270	121.9	117.8	113.4	111.6	109.1	18	20	21	22	22
48	HeZhaoFeng	58	55	163	129	145	72	710	34200	2	2	2	3	4	3	3	5	8	10	138	138	138	138	139	5.1	5	4.9	4.5	4.4	360	336	310	301	292	115.7	113.9	106.2	104.4	100.8	17	17	19	19	19
49	HuangChuan	77	70	164	120	147	51	560	30100	2	2	3	4	5	2	3	6	7	8	139	140	140	140	141	4.4	4.3	4	3.9	3.6	390	368	345	328	321	133.2	129.5	122.3	120.9	117.8	15	16	18	19	19
50	WeiHanMing	78	55	150	145	148	103	660	35100	2	2	3	4	5	2	2	5	7	9	144	143	144	144	147	4.8	4.9	4.8	4.4	4.2	299	289	267	244	236	114.1	110.1	104.3	102.1	100.5	22	22	23	24	26
51	LiGuiZhu	64	49	171	143	149	53	580	41000	1	1	2	3	3	2	2	5	8	9	142	142	144	144	145	4.6	4.7	4.6	4.5	4.3	325	313	291	278	226	124.1	119.2	113.3	111.9	104.7	16	18	20	20	22
52	WuKeZhi	67	68	162	135	150	84	610	27400	2	2	2	4	4	4	4	6	9	11	139	139	140	140	143	4.4	4.3	4	3.9	3.6	274	258	233	225	218	113.8	108.8	103.7	101.7	100.2	18	18	20	20	20
53	TengYuYou	74	65	162	143	150	56	930	40600	0	0	2	4	4	4	4	7	8	10	141	140	141	141	142	3.7	3.7	3.7	3.6	3.2	385	362	344	326	317	130.1	128.1	123.5	120.9	114.3	18	19	20	20	22
54	LiShengHua	74	51	157	147	150	58	750	31800	1	1	2	3	4	2	3	6	8	9	137	139	141	141	143	4.6	4.6	4.4	4	3.9	354	330	309	288	280	111.9	110.6	106	104.3	99.5	15	15	17	18	18
55	LiDaNian	75	57	169	135	150	111	770	34600	2	2	3	5	6	3	3	6	9	10	143	142	144	144	146	4.3	4.2	4	3.8	3.6	264	248	229	217	207	105.4	101.7	93.6	92.1	90.3	18	18	19	19	20
56	TanRenMou	73	55	165	147	151	115	810	41600	0	0	3	3	4	1	1	2	4	6	143	142	144	144	146	5	5	5	4.7	4.3	323	300	280	261	251	123.5	121.6	115.6	114	112.3	18	18	20	20	23
57	PangZeShan	66	56	162	140	151	52	650	41200	1	1	3	4	5	2	2	3	5	7	145	145	147	147	149	4.2	4	4	3.6	3.2	326	304	282	266	260	106.9	102.4	98.4	96.7	91.5	17	19	20	21	23
58	SunEnXiao	72	71	168	131	153	55	780	32600	2	2	3	4	5	5	5	8	11	12	132	132	133	133	133	3.8	3.9	3.9	3.6	3.4	357	330	308	289	280	120.1	118.7	111.5	110.2	107.3	17	18	20	21	23
59	LiSongRong	69	75	176	122	155	48	760	36600	1	1	2	3	4	2	2	3	6	8	134	135	135	135	138	4.5	4.4	4.3	4.1	4	352	334	308	297	291	102.3	101.3	96.7	94.6	88.6	21	23	25	25	27
60	YeCiZhong	69	70	173	146	156	58	680	32600	1	1	2	3	5	3	3	4	7	8	135	135	135	136	135	3.9	3.6	3.5	3.2	3.1	270	259	235	227	217	119.9	115.3	106.9	104.9	101.2	17	18	19	19	20
61	ZhaoYongZh	58	100	176	148	157	74	1480	37000	1	1	2	2	4	2	2	5	7	8	141	141	145	145	148	3.9	3.7	3.7	3.4	3.1	269	259	233	220	212	120.1	117.3	109.1	106.6	101.4	21	23	25	25	26
62	BanJingPen	75	60	158	156	161	85	620	33500	1	1	2	3	3	5	5	7	8	9	134	134	137	137	139	4.2	4	3.7	3.4	3.2	339	323	305	284	241	122.5	120.7	113.8	112.8	111.2	22	22	24	24	25
63	ZouChangMi	68	59	150	156	161	45	770	39600	0	1	2	3	5	4	4	7	10	11	140	140	141	141	143	5	4.8	4.5	4.4	4.1	345	329	310	292	283	120.7	118.8	115.2	114.2	112.4	18	18	19	20	22
64	LiMingChan	69	83	175	115	162	68	800	23200	2	2	2	3	5	1	1	4	6	8	142	142	142	142	144	3.8	3.6	3.4	3.2	3.1	352	344	310	290	280	103.7	100	94.4	92.7	89	19	21	22	22	23
65	CengYong	71	80	172	160	163	41	850	44600	2	3	3	4	5	1	2	5	7	8	136	136	136	136	139	3.8	3.6	3.5	3.3	2.9	313	286	271	262	253	109.9	107.4	103.1	101.7	97.7	22	23	24	25	26
66	DaiShuQuan	70	60	160	154	163	44	770	42400	2	2	3	4	5	1	1	4	7	9	139	139	139	139	140	4.5	4.6	4.4	4.1	3.9	325	313	287	267	259	129.8	127.1	122.7	119.7	114.7	19	19	21	21	22
67	ChenCaiXia	66	61	168	141	164	63	570	39600	2	2	2	4	5	5	5	7	10	12	132	133	134	134	135	4.8	4.9	4.6	4.3	4.2	334	307	277	267	258	131.2	127.6	123.9	122.2	117.4	22	23	25	25	28
68	WeiZongLin	65	75	176	140	166	70	1050	33300	0	0	1	3	3	1	1	2	4	6	137	137	137	137	138	4.4	4.3	4	3.7	3.5	350	330	304	287	280	134.4	130.2	121.9	120.6	114	22	23	24	24	27
69	LiuGuiJun	52	77	176	160	167	104	1230	42700	1	1	3	4	4	3	3	4	6	8	140	139	140	140	142	4.9	4.6	4.5	4.3	4.1	292	265	230	209	201	108.1	103.4	99.4	97.2	90.7	17	18	20	21	24
70	ChenHao	55	86	172	155	170	115	890	31800	1	1	2	4	4	5	5	6	8	10	138	138	140	140	142	5.1	5.2	4.9	4.5	4.4	280	264	240	228	220	110.3	107.1	99.2	96.2	93.2	22	23	24	25	25
71	YangZhongZ	60	74	174	137	173	83	680	32900	1	1	2	3	3	5	5	6	9	11	142	141	145	145	148	4.4	4.2	4.1	3.8	3.5	339	327	308	293	285	131	130	122.8	121.2	118.6	16	18	20	20	21
72	WuGuoHai	58	68	170	168	176	44	1140	44700	0	0	2	2	3	1	2	3	6	8	144	143	144	144	145	4.1	4	3.7	3.4	3.2	277	254	231	221	213	123.2	121.3	117.1	115.6	111	17	17	19	20	23
73	LeiYongXia	76	56	160	171	180	90	800	46300	0	0	1	3	4	2	2	3	6	7	134	136	136	136	139	5	4.7	4.5	4.1	4	373	356	321	313	307	136.1	133.3	129.7	128.3	124.9	16	17	18	19	21
74	SuXiangCha	84	70	168	175	180	99	820	46900	0	0	2	2	4	5	5	9	12	14	133	133	135	135	136	4.7	4.6	4.5	4.4	4.2	359	351	334	325	315	118.9	114.9	108.6	107.1	100.4	17	18	19	19	22
75	WenChuanWe	77	70	158	169	181	115	1180	45300	2	2	2	2	4	5	5	7	8	9	138	140	141	141	142	4.2	4.3	4.1	4	3.6	273	246	212	188	181	112.9	108.9	103.5	101.6	96.4	20	20	22	22	25
76	WuPing	66	77	168	175	182	104	1120	38500	0	0	2	2	4	1	2	5	6	8	134	136	137	137	139	4.3	4.2	4	3.6	3.2	265	251	231	210	203	98.2	94.9	86.3	84	83	18	18	19	20	21
77	WuRiFang	58	68	165	177	183	117	800	39100	0	0	2	3	4	2	2	5	7	8	140	140	140	140	141	4.9	5	4.8	4.6	4.3	323	306	285	276	270	133	130.8	126	124.3	116.5	16	17	19	19	20
78	LiuZhiHui	72	68	170	170	184	64	770	49800	2	2	3	4	4	3	4	7	10	12	145	144	146	146	147	4	4	3.7	3.5	3.1	305	286	269	252	244	135.1	133.7	129.3	127.8	120.3	17	19	20	21	22
79	DingYong	63	82	170	176	185	105	1440	43600	2	2	2	4	5	4	4	6	8	9	134	133	135	135	137	5	5.1	4.9	4.5	4.4	310	289	263	253	245	111.1	106.8	103.7	102.2	94.5	21	21	23	23	23
80	TanZhiJie	73	59	158	161	187	73	630	44100	1	1	2	5	5	1	1	3	4	5	140	141	141	141	143	3.9	3.7	3.6	3.3	3.1	299	274	240	214	206	114.4	111.5	105.9	103.8	97.6	19	20	21	22	22
81	LeiWuAn	60	76	175	158	187	112	1000	41100	2	2	2	4	4	1	1	3	4	5	140	139	141	141	143	4.3	4.4	4.3	4	3.7	276	264	231	223	204	139	134.7	131.4	129.3	127.5	19	20	21	22	24
82	DengJiaSha	67	80	172	173	190	71	1380	49800	1	1	1	2	4	5	5	6	9	10	144	145	146	146	147	4.4	4.1	3.8	3.7	3.6	277	269	249	229	220	133.5	129.4	125	122.2	117.1	16	17	18	19	21
83	LuoGuoYan	80	42	152	188	193	120	660	41700	1	1	1	3	4	5	5	6	7	9	142	142	143	143	146	4.3	4.1	3.8	3.6	3.3	370	361	328	304	294	131.9	129.9	123.9	121.6	116.5	18	18	20	20	21
84	LiangSuWu	69	63	167	194	197	102	1220	44600	0	0	2	2	4	4	4	6	9	11	135	136	138	138	139	4.9	4.6	4.3	4.2	4.1	385	374	343	332	325	140	137.1	129.9	128.5	121.7	16	17	18	19	22
85	LuDeSheng	65	70	167	190	198	76	1110	40200	2	2	3	3	4	5	5	8	10	11	135	134	135	135	135	4.2	3.9	3.9	3.5	3.3	306	288	262	248	239	132.4	131.3	125.4	123.6	117.1	19	20	21	22	25
86	LinShiMing	77	93	170	197	207	93	1230	40200	1	1	2	3	3	4	4	7	8	9	135	135	136	136	136	4.6	4.6	4.6	4.4	4.2	315	308	273	256	248	124.3	121.9	114.7	111.9	105.6	22	23	24	25	26
87	YeWeiQing	69	61	168	194	209	79	1180	43000	2	2	2	4	5	2	2	4	5	6	136	136	139	139	140	3.9	3.6	3.4	3.3	2.9	351	341	323	300	293	114.6	110.5	102.6	100.8	98	18	19	21	21	24
88	WangYuanLi	71	74	156	186	221	93	920	40200	0	0	2	3	4	4	4	7	9	10	132	133	135	135	136	4.7	4.6	4.6	4.5	4.4	355	340	324	308	301	124.6	119.7	114.2	112.9	107	22	23	25	26	28
89	WuQingNan	73	58	165	236	249	109	910	48000	2	2	2	3	5	2	2	5	6	7	135	135	138	138	139	4.2	3.9	3.8	3.4	3.1	340	314	283	270	261	134.2	132.5	129.4	127.3	121.4	17	18	19	20	23
90	ShenMingSh	61	66	174	322	359	82	1130	58900	0	0	2	3	5	1	1	4	6	8	139	139	142	142	143	4.1	4.1	3.8	3.7	3.3	298	282	263	255	248	114.2	112.7	106	103.3	99.2	20	22	24	24	25
